# Supplementary material for: Potentially pathogenic bacteria isolated from diverse habitats in Spitsbergen, Svalbard
Source: Springer Nature journal article supplement (doi:10.1007/s12665-020-8853-4), 2020-02-26
Supplement: MOESM1 [file 17745844]

## Supplementary Material

### Potentially pathogenic bacteria isolated from diverse habitats in Spitsbergen, Svalbard

Diana C. Mogrovejo-Arias, Florian H. H. Brill, Dirk Wagner

**\* Correspondence:**

Diana Mogrovejo

Dr. Brill + Partner GmbH

Stiegstück 34 - 22339 Hamburg, Germany

[Diana.Mogrovejo@brillhygiene.com](mailto:Diana.Mogrovejo@brillhygiene.com) / [dcmogrovejo@yahoo.com](mailto:dcmogrovejo@yahoo.com)

#### Supplementary Table 1:

Isolates obtained from environmental samples from the island of Spitsbergen. The table shows the name assigned to the isolates, GenBank Accession numbers, isolation temperature, sample from which it was obtained, closest taxonomic neighbor with their identity percentage

| Isolate | GenBank Accession number | Isolation temp. (°C) | Sample    | Phylum         | Family               | Closest taxonomic neighbor section   | GenBank Accession Closest Neighbor | % Id. |
|---------|--------------------------|----------------------|-----------|----------------|----------------------|--------------------------------------|------------------------------------|-------|
| An21    | MH714605                 | 17                   | Sediment  | Actinobacteria | Propionibacteriaceae | <i>Propioniciclava sp.</i>           | NR_112669.1                        | 93    |
| An24    | MH714606                 | 17                   | Sediment  | Actinobacteria | Microbacteriaceae    | <i>Cryobacterium arcticum</i>        | NR_108605.1                        | 99    |
| An34    | MH714607                 | 5                    | Sea water | Actinobacteria | Microbacteriaceae    | <i>Leifsonia kafniensis</i>          | NR_042669.1                        | 98    |
| An58    | MH714608                 | 17                   | Sediment  | Firmicutes     | Enterococcaceae      | <i>Enterococcus faecium</i>          | NR_113904.1                        | 99    |
| S3      | MH714651                 | 37                   | Sediment  | Actinobacteria | Micromonosporaceae   | <i>Micromonospora aurantiaca</i>     | NR_074415.1                        | 99    |
| S5      | MH714652                 | 37                   | Sea water | Firmicutes     | Bacillaceae          | <i>Fictibacillus phosphorivorans</i> | NR_118455.1                        | 100   |
| S7      | MH714653                 | 37                   | Sediment  | Firmicutes     | Bacillaceae          | <i>Bacillus cereus</i>               | NR_074540.1                        | 99    |

## Supplementary Material

|      |          |    |           |                |                      |                                        |             |    |
|------|----------|----|-----------|----------------|----------------------|----------------------------------------|-------------|----|
| S8   | MH714654 | 37 | Sediment  | Actinobacteria | Microbacteriaceae    | <i>Microbacterium lacticum</i>         | NR_026160.1 | 99 |
| S10  | MH714655 | 37 | Sea water | Actinobacteria | Cellulomonadaceae    | <i>Oerskovia paurometabola</i>         | NR_025471.1 | 99 |
| S15  | MH714656 | 17 | Sediment  | Firmicutes     | Planococcaceae       | <i>Sporosarcina globispora</i>         | NR_113837.1 | 99 |
| S16  | MH714657 | 17 | Sediment  | Actinobacteria | Micrococcaceae       | <i>Pseudoarthrobacter oxydans</i>      | NR_026236.1 | 99 |
| S20  | MH714658 | 17 | Snow      | Actinobacteria | Microbacteriaceae    | <i>Subtercola boreus</i>               | NR_025074.1 | 99 |
| S22  | MH714659 | 17 | Sea water | Actinobacteria | Nocardiaceae         | <i>Gordonia sputi</i>                  | NR_037031.1 | 99 |
| S23b | MH714660 | 37 | Sea water | Actinobacteria | Microbacteriaceae    | <i>Microbacterium maritypicum</i>      | NR_114986.1 | 98 |
| S24  | MH714661 | 17 | Sediment  | Actinobacteria | Brevibacteriaceae    | <i>Brevibacterium frigoritolerans</i>  | NR_117474.1 | 99 |
| S25  | MH714662 | 17 | Sediment  | Actinobacteria | Micrococcaceae       | <i>Arthrobacter luteolus</i>           | NR_025362.1 | 98 |
| S26  | MH714663 | 17 | Sediment  | Actinobacteria | Microbacteriaceae    | <i>Microbacterium diaminobutyricum</i> | NR_152648.1 | 98 |
| S27b | MH714664 | 17 | Sediment  | Firmicutes     | Carnobacteriaceae    | <i>Carnobacterium viridans</i>         | NR_025197.1 | 99 |
| S28  | MH714665 | 17 | Snow      | Actinobacteria | Microbacteriaceae    | <i>Agreia pratensis</i>                | NR_025460.1 | 99 |
| S31  | MH714666 | 17 | Sea water | Actinobacteria | Geodermatophilaceae  | <i>Blastococcus aggregatus</i>         | NR_114864.1 | 99 |
| S32  | MH714667 | 17 | Sea water | Actinobacteria | Propionibacteriaceae | <i>Tessaracoccus flavescens</i>        | NR_042550.1 | 99 |
| S34  | MH714668 | 5  | Snow      | Actinobacteria | Micrococcaceae       | <i>Arthrobacter citreus</i>            | NR_026188.1 | 99 |
| S35  | MH714669 | 5  | Sediment  | Proteobacteria | Moraxellaceae        | <i>Psychrobacter cibarius</i>          | NR_043057.1 | 99 |
| S44  | MH714670 | 37 | Snow      | Firmicutes     | Bacillaceae          | <i>Bacillus methylotrophicus</i>       | NR_116240.1 | 99 |
| S54  | MH714671 | 5  | Sea water | Actinobacteria | Microbacteriaceae    | <i>Agrococcus jenensis</i>             | NR_026275.1 | 99 |
| S58  | MH714672 | 5  | Sea water | Actinobacteria | Microbacteriaceae    | <i>Salinibacterium amurskyense</i>     | NR_041932.1 | 99 |
| S60  | MH714673 | 5  | Sea water | Actinobacteria | Microbacteriaceae    | <i>Microbacterium phyllosphaerae</i>   | NR_025405.1 | 98 |
| S65  | MH714674 | 17 | Sediment  | Bacteroidetes  | Cyclobacteriaceae    | <i>Algoriphagus aquimarinus</i>        | NR_025602.1 | 99 |
| S67  | MH714675 | 17 | Sediment  | Proteobacteria | Pseudomonadaceae     | <i>Pseudomonas peli</i>                | NR_042451.1 | 99 |
| S70  | MH714676 | 37 | Sediment  | Firmicutes     | Bacillaceae          | <i>Bacillus wiedmannii</i>             | NR_152692.1 | 99 |
| S71  | MH714677 | 37 | Sediment  | Firmicutes     | Bacillaceae          | <i>Bacillus licheniformis</i>          | NR_118996.1 | 99 |

## Supplementary Material

|      |          |    |          |                |                      |                                         |             |    |
|------|----------|----|----------|----------------|----------------------|-----------------------------------------|-------------|----|
| S72  | MH714678 | 37 | Sediment | Actinobacteria | Propionibacteriaceae | <i>Tessaracoccus profundi</i>           | NR_116583.1 | 98 |
| S73  | MH714679 | 5  | Sediment | Actinobacteria | Micrococcaceae       | <i>Paeniglutamibacter sulfureus</i>     | NR_026237.1 | 99 |
| S77  | MH714680 | 37 | Sediment | Firmicutes     | Bacillaceae          | <i>Lysinibacillus contaminans</i>       | NR_109740.1 | 99 |
| S81  | MH714681 | 17 | Sediment | Actinobacteria | Micrococcaceae       | <i>Arthrobacter siccitolerans</i>       | NR_108849.1 | 98 |
| S84  | MH714682 | 5  | Sediment | Proteobacteria | Moraxellaceae        | <i>Psychrobacter maritimus</i>          | NR_027225.1 | 99 |
| S87  | MH714683 | 17 | Sediment | Actinobacteria | Sanguibacteraceae    | <i>Sanguibacter antarcticus</i>         | NR_044173.1 | 99 |
| S88  | MH714684 | 17 | Sediment | Proteobacteria | Pseudomonadaceae     | <i>Pseudomonas trivialis</i>            | NR_028987.1 | 99 |
| S90  | MH714685 | 17 | Sediment | Firmicutes     | Planococcaceae       | <i>Sporosarcina psychrophila</i>        | NR_113752.1 | 98 |
| N2   | MH714612 | 37 | Soil     | Firmicutes     | Incertae Sedis XII   | <i>Exiguobacterium undae</i>            | NR_043477.1 | 99 |
| N7   | MH714613 | 37 | Soil     | Firmicutes     | Paenibacillaceae     | <i>Paenibacillus cellulositrophicus</i> | NR_116564.1 | 99 |
| N9   | MH714614 | 37 | Soil     | Firmicutes     | Incertae Sedis XII   | <i>Exiguobacterium antarcticum</i>      | NR_043476.1 | 99 |
| N10a | MH714615 | 37 | Soil     | Firmicutes     | Bacillaceae          | <i>Bacillus megaterium</i>              | NR_116873.1 | 99 |
| N15  | MH714616 | 17 | Soil     | Proteobacteria | Pseudomonadaceae     | <i>Pseudomonas graminis</i>             | NR_026395.1 | 99 |
| N17  | MH714617 | 37 | Soil     | Firmicutes     | Bacillaceae          | <i>Bacillus flexus</i>                  | NR_113800.1 | 99 |
| N18  | MH714618 | 37 | Soil     | Actinobacteria | Micromonosporaceae   | <i>Micromonospora chalcea</i>           | NR_118842.1 | 99 |
| N23  | MH714619 | 37 | Sediment | Firmicutes     | Bacillaceae          | <i>Bacillus clausii</i>                 | NR_026140.1 | 99 |
| N24  | MH714620 | 37 | Sediment | Firmicutes     | Bacillaceae          | <i>Bacillus sp.</i>                     | NR_026140.1 | 83 |
| N28  | MH714621 | 17 | Soil     | Actinobacteria | Streptomycetaceae    | <i>Streptomyces avidinii</i>            | NR_041132.1 | 99 |
| N30  | MH714622 | 17 | Soil     | Proteobacteria | Pseudomonadaceae     | <i>Rugamonas rubra</i>                  | NR_104915.1 | 98 |
| N30b | MH714623 | 17 | Soil     | Proteobacteria | Pseudomonadaceae     | <i>Pseudomonas frederiksbergensis</i>   | NR_117177.1 | 98 |
| N34  | MH714624 | 37 | Soil     | Firmicutes     | Bacillaceae          | <i>Bacillus amyloliquefaciens</i>       | NR_117946.1 | 99 |
| N36  | MH714625 | 17 | Sediment | Firmicutes     | Planococcaceae       | <i>Sporosarcina aquimarina</i>          | NR_025049.1 | 99 |
| N36a | MH714626 | 17 | Sediment | Bacteroidetes  | Sphingobacteriaceae  | <i>Pedobacter nyackensis</i>            | NR_044380.1 | 99 |
| N39  | MH714627 | 17 | Sediment | Firmicutes     | Carnobacteriaceae    | <i>Carnobacterium funditum</i>          | NR_113773.1 | 99 |

## Supplementary Material

|          |          |    |            |                |                   |                                      |             |     |
|----------|----------|----|------------|----------------|-------------------|--------------------------------------|-------------|-----|
| N41      | MH714628 | 17 | Soil       | Actinobacteria | Streptomycetaceae | <i>Streptomyces candidus</i>         | NR_112302.1 | 99  |
| N42      | MH714629 | 17 | Soil       | Actinobacteria | Streptomycetaceae | <i>Streptomyces fulvissimus</i>      | NR_103947.1 | 99  |
| N43      | MH714630 | 17 | Soil       | Proteobacteria | Sphingomonadaceae | <i>Sphingomonas aerolata</i>         | NR_042130.1 | 99  |
| N47      | MH714631 | 17 | Soil       | Actinobacteria | Microbacteriaceae | <i>Fron dih abitans sucicola</i>     | NR_125644.1 | 99  |
| N54      | MH714632 | 37 | Soil       | Firmicutes     | Bacillaceae       | <i>Psychrobacillus sp.</i>           | NR_025409.1 | 94  |
| N57b     | MH714633 | 37 | Soil       | Firmicutes     | Paenibacillaceae  | <i>Paenibacillus lactis</i>          | NR_025739.1 | 99  |
| N58      | MH714634 | 5  | Sediment   | Firmicutes     | Carnobacteriaceae | <i>Carnobacterium alterfunditum</i>  | NR_104715.1 | 99  |
| N60(N40) | MH714635 | 5  | Soil       | Proteobacteria | Pseudomonadaceae  | <i>Pseudomonas helmanticensis</i>    | NR_126220.1 | 98  |
| N61      | MH714636 | 17 | Sediment   | Proteobacteria | Moraxellaceae     | <i>Psychrobacter nivimaris</i>       | NR_028948.1 | 99  |
| N71      | MH714637 | 5  | Soil       | Proteobacteria | Pseudomonadaceae  | <i>Pseudomonas lurida</i>            | NR_042199.1 | 99  |
| N72      | MH714638 | 5  | Soil       | Bacteroidetes  | Flavobacteriaceae | <i>Flavobacterium piscis</i>         | NR_133746.1 | 98  |
| N78      | MH714639 | 17 | Soil       | Proteobacteria | Acetobacteraceae  | <i>Roseomonas aquatica</i>           | NR_042501.1 | 99  |
| N81b     | MH714640 | 17 | Soil       | Firmicutes     | Bacillaceae       | <i>Lysinibacillus chungkukjangi</i>  | NR_109669.1 | 99  |
| N82      | MH714641 | 17 | Snow       | Firmicutes     | Paenibacillaceae  | <i>Paenibacillus taichungensis</i>   | NR_044428.1 | 99  |
| N83      | MH714642 | 17 | Snow       | Firmicutes     | Bacillaceae       | <i>Bacillus idriensis</i>            | NR_043268.1 | 99  |
| N84      | MH714643 | 17 | Melt water | Actinobacteria | Micrococcaceae    | <i>Arthrobacter agilis</i>           | NR_026198.1 | 99  |
| N85      | MH714644 | 37 | Melt water | Firmicutes     | Bacillaceae       | <i>Bacillus niabensis</i>            | NR_043334.1 | 98  |
| N87      | MH714645 | 5  | Sea water  | Proteobacteria | Pseudomonadaceae  | <i>Pseudomonas salina</i>            | NR_137210.1 | 98  |
| N91      | MH714646 | 17 | Melt water | Actinobacteria | Microbacteriaceae | <i>Cryobacterium psychrotolerans</i> | NR_043892.1 | 100 |
| N92      | MH714647 | 17 | Pond water | Proteobacteria | Sphingomonadaceae | <i>Polymorphobacter fuscus</i>       | NR_145642.1 | 99  |
| N93      | MH714648 | 37 | Sea water  | Firmicutes     | Bacillaceae       | <i>Bacillus infantis</i>             | NR_043267.1 | 99  |
| N96      | MH714649 | 17 | Sediment   | Proteobacteria | Acetobacteraceae  | <i>Roseomonas eburnea</i>            | NR_147765.1 | 97  |
| N106     | MH714650 | 17 | Melt water | Actinobacteria | Microbacteriaceae | <i>Salinibacterium xinjiangense</i>  | NR_043893.1 | 99  |
